# Supplementary material for: Genetic Variants in MiRNA Processing Genes and Pre-MiRNAs Are Associated with the Risk of Chronic Lymphocytic Leukemia
Source: PLoS One. 2015 Mar 20;10(3):e0118905. doi: 10.1371/journal.pone.0118905 (PMC4368096; doi:10.1371/journal.pone.0118905)
Supplement: S2 Table — (XLS) [file pone.0118905.s002.xls]

## Sheet: Hoja1
S2 Table . Characteristics of the Single Nucleotide Polymorphisms in microRNA processing genes and selection criteria
n	Gene	SNP ID	Alleles	Chr	Location	Function	Reason for selection
1	GEMIN3	rs197412	T>C	1	112308953	non-synonimous	NS, BIB
2	GEMIN3	rs197414	C>A	1	112309123	non-synonimous	NS, BIB
3	GEMIN3	rs197388	T>A	1	112297482	Upstream	UR, BIB
4	GEMIN3	rs563002	T>C	1	112317135	Downstream	BIB
5	CNOT2	rs10506586	C>A	12	70715490	non-synonimous	NS, SR
6	TNRC6A	rs6497759	G>A	16	24801737	non-synonimous	NS
7	CNOT1	rs11644694	G>A	16	58557342	non-synonimous	NS, SR
8	CNOT1	rs37060	C>T	16	58566304	Intronic	SR
9	CNOT1	rs11866002	C>T	16	58587737	Synonimous	SR
10	GEMIN4	rs1062923	T>C	17	649067	non-synonimous	NS, BIB
11	GEMIN4	rs2740348	G>C	17	649935	non-synonimous	NS, BIB
12	GEMIN4	rs34610323	C>T	17	648546	non-synonimous	NS
13	GEMIN4	rs3744741	C>T	17	649232	non-synonimous	NS, BIB
14	GEMIN4	rs7813	C>T	17	648186	non-synonimous	NS, BIB
15	GEMIN4	rs910924	C>T	17	655920	5’UTR	5UTR, BIB
16	CNOT3	rs42318	G>A	19	54657069	non-synonimous	NS
17	TNRC6B	rs2413621	T>C	22	40673999	Intronic	SR
18	TNRC6B	rs9611280	G>A	22	40552119	non-synonimous	NS, SR
19	TNRC6B	rs4821943	A>G	22	40722745	3’UTR	MIRTS
20	TNRC6B	rs470113	A>G	22	40729614	3’UTR	MIRTS
21	TNRC6B	rs139919	T>C	22	40726183	3’UTR	MIRTS
22	DGCR8	rs35987994	T>C	22	20074006	non-synonimous	NS
23	DGCR8	rs417309	G>A	22	20098544	3’UTR	3UTR BIB
24	DGCR8	rs3757	G>A	22	20099331	3’UTR	MIRTS, BIB
25	DGCR8	rs1640299	T>G	22	20098359	3’UTR	BIB
26	DGCR8	rs9606248	A>G	22	20087539	Intronic	BIB
27	GEMIN5	rs1974777	A>G	5	154291409	non-synonimous	NS
28	GEMIN5	rs6865950	G>A	5	154275786	non-synonimous	NS
29	GEMIN5	rs816736	T>C	5	154271948	Synonimous	SR
30	CNOT6	rs6877400	T>C	5	179996111	Synonimous	SR
31	CNOT6	rs11738060	T>A	5	180004154	3’UTR	MIRTS
32	DROSHA	rs55656741	G>A	5	31515657	non-synonimous	NS, SR
33	DROSHA	rs10719	C>T	5	31401447	3’ UTR	SR, BIB
34	DROSHA	rs6877842	G>C	5	31532638	5’ near gene	BIB
35	DROSHA	rs2287584	T>C	5	31423007	Synonimous	SR, BIB
36	DROSHA	rs4867329	A>C	5	31435627	Intronic	BIB
37	DROSHA	rs7719666	C>T	5	31520778	Intronic	BIB
38	DROSHA	rs10035440	T>C	5	31539463	Intronic	BIB
39	DROSHA	rs17408716	A>G	5	31467952	Intronic	BIB
40	DROSHA	rs3792830	T>C	5	31416248	Intronic	BIB
41	DROSHA	rs493760	T>C	5	31437040	Intronic	BIB
42	DROSHA	rs7735863	G>A	5	31486540	Intronic	BIB
43	DROSHA	rs6884823	G>A	5	31491121	Intronic	BIB
44	DROSHA	rs639174	C>T	5	31433647	Intronic	BIB
45	DROSHA	rs3805500	T>C	5	31462977	Intronic	BIB
46	SMAD5	rs3764941	A>C	5	135469527	non-synonimous	NS, SR
47	SMAD5	rs3764942	G>A	5	135469500	Intronic	SR
48	XPO5	rs1106841	A>C	6	43496662	Synonimous	SR
49	XPO5	rs34324334	C>T	6	43535018	non-synonimous	NS, SR
50	XPO5	rs2257082	C>T	6	43492578	Synonimous	SR, BIB
51	XPO5	rs2227301	G>A	6	43485283	Downstream	BIB
52	XPO5	rs7755135	C>T	6	43490809	3’UTR	MIRTS
53	CNOT4	rs1003226	T>C	7	135046552	3’UTR	SR
54	CNOT4	rs3812265	C>T	7	135048804	non-synonimous	NS, SR
55	CNOT4	rs3763425	C>T	7	135195320	upstream	UR
56	SND1	rs17151639	A>G	7	127637816	non-synonimous	NS
57	SND1	rs322825	C>T	7	127721507	synonimous	SR
58	SND1	rs3823994	T>A	7	127669857	intronic	SR
59	SND1	rs17676986	C>T	7	127636958	intronic	TR
60	RAN	rs14035	C>T	12	131361241	3’UTR	MIRTS, BIB
61	RAN	rs11061209	G>A	12	131364988	downstream	BIB
62	DICER	rs3742330	A>G	14	95553362	3’UTR	BIB
63	DICER	rs13078	T>A	14	95556747	3’UTR	3UTR, BIB
64	DICER	rs1209904	C>T	14	95563712	intronic	BIB
65	DICER	rs1057035	T>C	14	95554142	3’UTR	MIRTS
66	TRBP	rs784567	C>T	12	53894465	upstream	BIB
67	EIF2C1	rs636832	G>A	1	36363475	intronic	BIB
68	EIF2C1	rs595961	A>G	1	36367780	intronic	BIB
69	EIF2C2	rs4961280	C>A	1	141647414	upstream	UR, BIB
70	EIF2C2	rs2293939	G>A	1	141551407	synonimous	SR
71	EIF2C2	rs2292778	C>T	1	141568622	synonimous	SR
72	HIWI	rs1106042	G>A	12	130841638	non-synonimous	NS, SR, BIB
3UTR: 3’UTR regulation; 5UTR: 5’UTR regulation; BIB: Bibliographic; MIRTS: miRNA target site; NS: Non-synonimous; SR: Splicing regulation; UR: Upstream regulation.
