# Supplementary material for: Genetic Variants in MiRNA Processing Genes and Pre-MiRNAs Are Associated with the Risk of Chronic Lymphocytic Leukemia
Source: PLoS One. 2015 Mar 20;10(3):e0118905. doi: 10.1371/journal.pone.0118905 (PMC4368096; doi:10.1371/journal.pone.0118905)
Supplement: S6 Table — (XLS) [file pone.0118905.s006.xls]

## Sheet: Hoja1
S6 Table. Correlation between SNP alleles and clinical parameters
Rai stage						Atypical Morphology						B2MG						LDH						Genomic aberrations						Marrow infiltration						Adenopathy						Lymphocyte doubling time						Residual Minimum Disease
SNP	Assoc Allele	0, I-IV ratios	Chi Square	P value	P Value corrected	SNP	Assoc Allele	Yes, no ratios	Chi Square	P value	P Value corrected	SNP	Assoc Allele	Increased, normal ratios	Chi Square	P value	P Value corrected	SNP	Assoc Allele	Increased, normal ratios	Chi Square	P value	P Value corrected	SNP	Assoc Allele	Yes, no ratios	Chi Square	P value	P Value corrected	SNP	Assoc Allele	Diffuse, non-diffuse ratios	Chi Square	P value	P Value corrected	SNP	Assoc Allele	Yes, nol ratios	Chi Square	P value	P Value corrected	SNP	Assoc Allele	< 12 months, > 12 ratios	Chi Square	P value	P Value corrected	SNP	Assoc Allele
rs10035440	T	0.900, 0.744	5586	0.0181	0.9190	rs10035440	C	0.238, 0.105	3235	0.0721	1	rs10035440	C	0.219, 0.184	0.312	0.5763	1	rs10035440	C	0.229, 0.118	2106	0.1467	1	rs10035440	T	0.792, 0.750	0.18	0.6713	1	rs10035440	C	0.232, 0.125	1379	0.2403	1	rs10035440	C	0.203, 0.125	1026	0.3112	1	rs10035440	C	0.219, 0.188	0.217	0.641	1	rs10035440	C
rs10061133	G	0.081, 0.068	0.083	0.7731	1	rs10061133	G	0.112, 0.023	3293	0.0696	1	rs10061133	A	0.918, 0.912	0.02	0.8885	1	rs10061133	A	0.915, 0.875	0.598	0.4393	1	rs10061133	A	0.929, 0.889	0.344	0.5576	1	rs10061133	G	0.087, 0.071	0.073	0.7875	1	rs10061133	A	0.933, 0.853	2266	0.1322	1	rs10061133	A	0.917, 0.885	0.471	0.4927	1	rs10061133	A
rs10173558	C	0.129, 0.098	0.367	0.5445	1	rs10173558	C	0.131, 0.091	0.522	0.4699	1	rs10173558	T	0.882, 0.859	0.217	0.6415	1	rs10173558	C	0.127, 0.111	0.065	0.7993	1	rs10173558	T	0.907, 0.900	0.011	0.9169	1	rs10173558	C	0.127, 0.083	0.365	0.5455	1	rs10173558	C	0.127, 0.088	0.386	0.5345	1	rs10173558	T	0.910, 0.860	0.992	0.3192	1	rs10173558	C
rs10505168	C	0.210, 0.182	0.181	0.6705	1	rs10505168	T	0.819, 0.632	6328	0.0119	0.806	rs10505168	T	0.824, 0.789	0.327	0.5675	1	rs10505168	C	0.207, 0.176	0.166	0.6835	1	rs10505168	T	0.759, 0.667	0.698	0.4034	1	rs10505168	T	0.786, 0.731	0.382	0.5364	1	rs10505168	T	0.788, 0.735	0.432	0.5112	1	rs10505168	T	0.790, 0.731	0.753	0.3855	1	rs10505168	C
rs10506586	A	0.129, 0.107	0.166	0.6836	1	rs10506586	C	0.880, 0.857	0.155	0.6938	1	rs10506586	C	0.885, 0.872	0.075	0.7838	1	rs10506586	A	0.142, 0.105	0.355	0.5512	1	rs10506586	C	0.907, 0.600	13196	3.0E-4	0.152	rs10506586	C	0.912, 0.786	3776	0.052	0.999	rs10506586	C	0.906, 0.806	2781	0.0954	1	rs10506586	C	0.894, 0.852	0.683	0.4087	1	rs10506586	A
rs1057035	T	0.656, 0.591	0.67	0.4129	1																									rs1057035	C	0.401, 0.154	5824	0.0158	0.884	rs1057035	T	0.642, 0.529	1452	0.2282	1	rs1057035	C	0.431, 0.241	6013	0.0142	0.884	rs1057035	T
rs1062923	A	0.984, 0.848	7798	0.0052	0.541	rs1062923	G	0.111, 0.091	0.148	0.7004	1	rs1062923	G	0.088, 0.077	0.074	0.7855	1	rs1062923	G	0.116, 0.050	1.51	0.2191	1	rs1062923	A	0.909, 0.900	0.017	0.8972	1	rs1062923	G	0.111, 0.000	3189	0.0741	1	rs1062923	G	0.104, 0.000	3875	0.049	0.997	rs1062923	G	0.132, 0.019	5297	0.0214	0.963	rs1062923	A
rs10719	A	0.138, 0.133	0.0060	0.9363	1	rs10719	A	0.141, 0.125	0.069	0.793	1	rs10719	G	0.867, 0.829	0.497	0.481	1	rs10719	A	0.181, 0.083	2063	0.151	1	rs10719	A	0.163, 0.050	1.74	0.1871	1	rs10719	A	0.136, 0.045	1431	0.2315	1	rs10719	A	0.127, 0.125	0.0010	0.9772	1	rs10719	A	0.162, 0.083	1.82	0.1773	1	rs10719	G
rs1077020	G	0.281, 0.216	0.859	0.354	1	rs1077020	G	0.282, 0.136	3885	0.0487	1	rs1077020	A	0.790, 0.738	0.685	0.4079	1	rs1077020	G	0.241, 0.211	0.156	0.6926	1	rs1077020	G	0.264, 0.250	0.016	0.8984	1	rs1077020	G	0.232, 0.179	0.382	0.5366	1	rs1077020	A	0.773, 0.706	0.66	0.4164	1	rs1077020	A	0.764, 0.704	0.758	0.3841	1	rs1077020	A
rs1106042	G	0.983, 0.930	2183	0.1395	1	rs1106042	A	0.065, 0.000	3009	0.0828	1	rs1106042	A	0.065, 0.000	5406	0.0201	0.9440	rs1106042	A	0.038, 0.000	1.47	0.2254	1	rs1106042	A	0.066, 0.000	1.26	0.2617	1	rs1106042	A	0.068, 0.000	2023	0.1549	1	rs1106042	A	0.062, 0.029	0.561	0.454	1	rs1106042	A	0.064, 0.000	3374	0.0662	1	rs1106042	G
rs1106841	C	0.480, 0.417	0.51	0.4751	1	rs1106841	A	0.622, 0.368	7908	0.0049	0.580	rs1106841	C	0.478, 0.382	1461	0.2267	1	rs1106841	C	0.440, 0.412	0.09	0.7643	1	rs1106841	C	0.427, 0.312	0.744	0.3884	1	rs1106841	A	0.586, 0.500	0.567	0.4515	1	rs1106841	C	0.492, 0.333	2422	0.1196	1	rs1106841	C	0.432, 0.409	0.07	0.7918	1	rs1106841	C
rs11259096	T	1.000, 0.932	3984	0.0459	0.998	rs11259096	C	0.070, 0.000	2803	0.0941	1	rs11259096	C	0.053, 0.053	0.0	0.9871	1	rs11259096	C	0.070, 0.056	0.093	0.7607	1	rs11259096	C	0.078, 0.050	0.198	0.6565	1	rs11259096	C	0.051, 0.045	0.011	0.9161	1	rs11259096	C	0.063, 0.000	2272	0.1317	1	rs11259096	C	0.081, 0.020	2245	0.134	1	rs11259096	C
rs11614913	T	0.453, 0.411	0.27	0.6036	1	rs11614913	C	0.575, 0.523	0.383	0.5358	1	rs11614913	C	0.608, 0.410	6916	0.0085	0.7330	rs11614913	C	0.535, 0.529	0.0030	0.9534	1	rs11614913	T	0.509, 0.227	5868	0.0154	0.895							rs11614913	T	0.455, 0.417	0.171	0.6795	1	rs11614913	T	0.479, 0.352	2599	0.1069	1	rs11614913	T
rs11644694	A	0.054, 0.012	2.18	0.1399	1	rs11644694	A	0.032, 0.028	0.015	0.9037	1	rs11644694	A	0.064, 0.000	5029	0.0249	0.9710	rs11644694	A	0.038, 0.000	1508	0.2194	1	rs11644694	G	0.971, 0.938	0.487	0.4851	1	rs11644694	A	0.045, 0.000	1117	0.2906	1	rs11644694	G	0.968, 0.933	0.799	0.3714	1	rs11644694	G	0.978, 0.940	1686	0.1941	1	rs11644694	A
rs11866002	T	0.293, 0.244	0.427	0.5136	1	rs11866002	C	0.712, 0.684	0.11	0.7402	1	rs11866002	C	0.770, 0.694	1237	0.266	1	rs11866002	T	0.289, 0.200	1012	0.3145	1	rs11866002	T	0.265, 0.250	0.019	0.8913	1	rs11866002	T	0.268, 0.136	1757	0.185	1	rs11866002	T	0.266, 0.250	0.032	0.8574	1	rs11866002	T	0.355, 0.200	4099	0.0429	0.998	rs11866002	C
rs1209904	C	0.850, 0.841	0.022	0.8809	1	rs1209904	C	0.840, 0.750	1755	0.1853	1	rs1209904	T	0.255, 0.162	2179	0.1399	1	rs1209904	T	0.199, 0.167	0.196	0.658	1	rs1209904	T	0.157, 0.150	0.0070	0.9332	1	rs1209904	C	0.845, 0.667	4413	0.0357	0.9890	rs1209904	T	0.194, 0.125	0.831	0.3619	1	rs1209904	C	0.812, 0.780	0.249	0.6179	1	rs1209904	T
rs12803915	T	0.196, 0.107	2188	0.1391	1	rs12803915	C	0.854, 0.850	0.0040	0.9475	1	rs12803915	C	0.900, 0.824	2002	0.1571	1	rs12803915	T	0.178, 0.029	4773	0.0289	0.973	rs12803915	C	0.856, 0.812	0.204	0.6518	1	rs12803915	C	0.869, 0.833	0.222	0.6378	1	rs12803915	T	0.148, 0.094	0.623	0.43	1	rs12803915	C	0.864, 0.812	0.722	0.3955	1	rs12803915	T
						rs12894467	C	0.669, 0.429	8136	0.0043	0.534	rs12894467	C	0.627, 0.526	1885	0.1698	1	rs12894467	T	0.398, 0.395	0.0010	0.9741	1	rs12894467	C	0.609, 0.600	0.0060	0.9389	1	rs12894467	C	0.620, 0.577	0.17	0.6804	1	rs12894467	T	0.390, 0.389	0.0	0.9929	1	rs12894467	C	0.604, 0.593	0.022	0.8822	1	rs12894467	C
rs13078	T	0.914, 0.856	1.12	0.29	1	rs13078	T	0.864, 0.762	2565	0.1093	1	rs13078	T	0.816, 0.808	0.021	0.8841	1	rs13078	T	0.838, 0.806	0.214	0.6435	1	rs13078	T	0.870, 0.833	0.181	0.6702	1	rs13078	T	0.850, 0.818	0.147	0.7009	1	rs13078	A	0.167, 0.118	0.492	0.4831	1	rs13078	A	0.171, 0.167	0.0060	0.9396	1	rs13078	T
						rs13186787	A	0.970, 0.952	0.333	0.5642	1													rs13186787	G	0.079, 0.000	1.86	0.1726	1													rs13186787	G	0.048, 0.018	0.963	0.3263	1
rs139919	C	0.133, 0.085	0.844	0.3583	1	rs139919	C	0.112, 0.100	0.046	0.8309	1	rs139919	T	0.906, 0.903	0.0060	0.9395	1	rs139919	T	0.918, 0.833	2363	0.1242	1	rs139919	T	0.892, 0.700	5148	0.0233	0.9700	rs139919	C	0.106, 0.071	0.308	0.579	1	rs139919	T	0.919, 0.844	1673	0.1959	1	rs139919	T	0.910, 0.860	1001	0.3171	1	rs139919	C
rs14035	T	0.300, 0.288	0.023	0.8788	1	rs14035	T	0.296, 0.263	0.155	0.6936	1	rs14035	C	0.686, 0.662	0.102	0.7493	1	rs14035	T	0.325, 0.192	1837	0.1753	1	rs14035	C	0.719, 0.714	0.0010	0.9723	1	rs14035	T	0.306, 0.300	0.0030	0.9537	1	rs14035	T	0.322, 0.192	1712	0.1907	1	rs14035	T	0.321, 0.225	1352	0.2449	1	rs14035	T
rs1640299	T	0.464, 0.378	1067	0.3016	1	rs1640299	G	0.605, 0.476	2247	0.1339	1	rs1640299	T	0.430, 0.392	0.255	0.6138	1	rs1640299	G	0.620, 0.553	0.587	0.4435	1	rs1640299	T	0.453, 0.333	0.894	0.3445	1	rs1640299	T	0.426, 0.423	0.0010	0.9744	1	rs1640299	T	0.425, 0.400	0.065	0.7991	1	rs1640299	T	0.436, 0.375	0.541	0.4621	1	rs1640299	T
rs17091403	C	0.900, 0.889	0.047	0.829	1	rs17091403	C	0.908, 0.886	0.181	0.6708	1	rs17091403	T	0.146, 0.051	4148	0.0417	0.9950	rs17091403	T	0.112, 0.079	0.365	0.546	1	rs17091403	T	0.132, 0.100	0.156	0.6927	1	rs17091403	T	0.116, 0.115	0.0	0.9935	1	rs17091403	T	0.115, 0.059	0.928	0.3354	1	rs17091403	T	0.116, 0.100	0.094	0.7591	1	rs17091403	T
rs17151639	A	0.774, 0.744	0.176	0.6745	1	rs17151639	G	0.294, 0.214	1048	0.3059	1	rs17151639	G	0.280, 0.269	0.025	0.8732	1	rs17151639	G	0.287, 0.263	0.084	0.7725	1	rs17151639	A	0.764, 0.650	1154	0.2828	1	rs17151639	A	0.757, 0.692	0.488	0.485	1	rs17151639	G	0.287, 0.147	2767	0.0962	1	rs17151639	G	0.296, 0.212	1.36	0.2435	1	rs17151639	A
rs17408716	-	0.071, 0.071	0.0	1.0	1	rs17408716	G	0.067, 0.025	1005	0.3161	1	rs17408716	G	0.085, 0.041	1344	0.2463	1	rs17408716	A	0.943, 0.941	0.0020	0.9662	1	rs17408716	G	0.070, 0.056	0.05	0.8224	1	rs17408716	A	0.939, 0.917	0.175	0.6758	1	rs17408716	G	0.071, 0.062	0.031	0.8593	1	rs17408716	G	0.074, 0.043	0.504	0.4777	1	rs17408716	G
rs17676986	C	0.887, 0.767	3543	0.0598	1	rs17676986	C	0.821, 0.786	0.274	0.6008	1	rs17676986	T	0.189, 0.176	0.049	0.8244	1	rs17676986	C	0.835, 0.765	0.971	0.3243	1	rs17676986	T	0.173, 0.167	0.0040	0.9496	1	rs17676986	T	0.215, 0.125	1039	0.3081	1	rs17676986	T	0.213, 0.147	0.744	0.3882	1	rs17676986	T	0.199, 0.135	1056	0.3041	1	rs17676986	C
rs197388	A	0.857, 0.841	0.063	0.8012	1	rs197388	A	0.856, 0.778	1325	0.2497	1	rs197388	A	0.878, 0.800	1807	0.1789	1	rs197388	A	0.851, 0.778	1149	0.2838	1	rs197388	A	0.885, 0.750	2168	0.1409	1	rs197388	A	0.867, 0.846	0.081	0.7757	1	rs197388	T	0.155, 0.147	0.013	0.9081	1	rs197388	A	0.839, 0.820	0.09	0.7644	1	rs197388	T
rs197412	T	0.672, 0.644	0.122	0.7267	1	rs197412	T	0.647, 0.619	0.116	0.7335	1	rs197412	T	0.653, 0.639	0.037	0.8485	1	rs197412	T	0.642, 0.611	0.121	0.7277	1	rs197412	T	0.676, 0.550	1185	0.2764	1	rs197412	C	0.348, 0.269	0.606	0.4362	1	rs197412	T	0.638, 0.594	0.22	0.6389	1	rs197412	T	0.657, 0.540	2.16	0.1416	1	rs197412	C
rs197414	C	0.845, 0.784	0.789	0.3743	1	rs197414	C	0.824, 0.786	0.314	0.5749	1	rs197414	C	0.829, 0.808	0.125	0.7232	1	rs197414	A	0.178, 0.175	0.0020	0.9639	1	rs197414	C	0.816, 0.750	0.466	0.495	1	rs197414	C	0.842, 0.808	0.18	0.6717	1	rs197414	C	0.831, 0.800	0.154	0.695	1	rs197414	C	0.810, 0.800	0.021	0.8852	1	rs197414	A
rs1974777	C	0.196, 0.116	1729	0.1886	1	rs1974777	T	0.886, 0.833	0.752	0.3857	1	rs1974777	C	0.149, 0.135	0.064	0.7997	1	rs1974777	T	0.873, 0.833	0.406	0.5241	1	rs1974777	T	0.880, 0.750	1.96	0.1615	1	rs1974777	T	0.866, 0.792	0.896	0.3438	1	rs1974777	T	0.847, 0.812	0.222	0.6375	1	rs1974777	T	0.875, 0.860	0.073	0.7867	1	rs1974777	T
rs2043556	C	0.231, 0.190	0.319	0.5722	1	rs2043556	T	0.795, 0.778	0.049	0.8248	1	rs2043556	C	0.244, 0.176	1144	0.2848	1	rs2043556	C	0.213, 0.158	0.578	0.4472	1	rs2043556	T	0.882, 0.500	13.14	3.0E-4	0.152	rs2043556	T	0.812, 0.731	0.898	0.3434	1	rs2043556	T	0.820, 0.800	0.062	0.8033	1	rs2043556	T	0.828, 0.771	0.752	0.3858	1	rs2043556	T
rs2114358	A	0.672, 0.614	0.522	0.4699	1	rs2114358	G	0.378, 0.350	0.108	0.742	1	rs2114358	A	0.663, 0.588	1002	0.3167	1	rs2114358	A	0.660, 0.556	1.41	0.235	1	rs2114358	A	0.590, 0.500	0.552	0.4573	1	rs2114358	G	0.375, 0.346	0.078	0.7802	1	rs2114358	A	0.648, 0.647	0.0	0.9881	1	rs2114358	G	0.370, 0.365	0.0030	0.9575	1	rs2114358	G
rs2227301	T	0.241, 0.170	1105	0.2932	1	rs2227301	C	0.788, 0.762	0.128	0.7206	1	rs2227301	T	0.266, 0.175	2056	0.1516	1	rs2227301	T	0.216, 0.200	0.049	0.8243	1	rs2227301	T	0.191, 0.167	0.06	0.807	1	rs2227301	C	0.801, 0.750	0.374	0.5407	1	rs2227301	T	0.223, 0.206	0.047	0.8293	1	rs2227301	T	0.222, 0.200	0.108	0.7424	1	rs2227301	T
rs2257082	A	0.219, 0.190	0.18	0.6717	1	rs2257082	A	0.222, 0.119	2178	0.14	1	rs2257082	G	0.802, 0.775	0.193	0.6606	1	rs2257082	A	0.222, 0.194	0.134	0.7146	1	rs2257082	G	0.784, 0.727	0.337	0.5617	1	rs2257082	A	0.216, 0.179	0.2	0.6547	1	rs2257082	G	0.806, 0.750	0.543	0.4612	1	rs2257082	A	0.243, 0.185	0.729	0.3932	1	rs2257082	G
rs2287584	C	0.167, 0.141	0.182	0.6697	1	rs2287584	T	0.823, 0.818	0.0060	0.9388	1	rs2287584	T	0.850, 0.780	1467	0.2259	1	rs2287584	C	0.196, 0.125	1104	0.2934	1	rs2287584	C	0.196, 0.150	0.238	0.6255	1	rs2287584	C	0.169, 0.107	0.67	0.413	1	rs2287584	T	0.846, 0.824	0.099	0.753	1	rs2287584	C	0.181, 0.130	0.733	0.3918	1	rs2287584	T
rs2289030	G	0.948, 0.915	0.595	0.4403	1	rs2289030	C	0.086, 0.000	3714	0.054	1	rs2289030	C	0.096, 0.054	1057	0.3038	1	rs2289030	C	0.084, 0.029	1227	0.268	1	rs2289030	C	0.066, 0.000	1398	0.237	1	rs2289030	C	0.070, 0.042	0.274	0.6004	1	rs2289030	C	0.067, 0.031	0.589	0.443	1	rs2289030	C	0.077, 0.060	0.167	0.6829	1	rs2289030	G
rs2292778	A	0.533, 0.380	3444	0.0635	1	rs2292778	G	0.531, 0.455	0.807	0.3691	1	rs2292778	G	0.561, 0.450	2181	0.1398	1	rs2292778	G	0.518, 0.474	0.244	0.6215	1	rs2292778	G	0.562, 0.438	0.883	0.3474	1	rs2292778	G	0.556, 0.385	2601	0.1068	1	rs2292778	G	0.515, 0.469	0.219	0.6399	1	rs2292778	G	0.547, 0.458	1.15	0.2835	1	rs2292778	A
rs2293939	A	0.250, 0.238	0.028	0.8672	1	rs2293939	A	0.244, 0.136	2315	0.1282	1	rs2293939	A	0.235, 0.212	0.125	0.7242	1	rs2293939	G	0.787, 0.700	1.36	0.2436	1	rs2293939	A	0.298, 0.100	3403	0.0651	1	rs2293939	A	0.232, 0.179	0.382	0.5366	1	rs2293939	A	0.227, 0.222	0.0040	0.9488	1	rs2293939	G	0.782, 0.759	0.113	0.7367	1	rs2293939	A
rs2368393	G	0.328, 0.225	1803	0.1793	1	rs2368393	A	0.753, 0.667	1263	0.261	1	rs2368393	A	0.778, 0.705	1158	0.2819	1	rs2368393	A	0.744, 0.611	2561	0.1095	1	rs2368393	G	0.240, 0.222	0.028	0.8673	1	rs2368393	A	0.776, 0.682	0.929	0.3352	1	rs2368393	A	0.782, 0.618	3824	0.0505	0.998	rs2368393	A	0.757, 0.688	0.9	0.3429	1	rs2368393	G
rs2682818	C	0.935, 0.932	0.0080	0.9294	1	rs2682818	C	0.949, 0.905	1.17	0.2793	1	rs2682818	A	0.071, 0.064	0.037	0.8481	1	rs2682818	C	0.938, 0.895	0.896	0.3438	1	rs2682818	A	0.036, 0.000	0.676	0.4111	1	rs2682818	C	0.942, 0.923	0.137	0.711	1	rs2682818	A	0.085, 0.056	0.33	0.5658	1	rs2682818	A	0.077, 0.060	0.167	0.6829	1	rs2682818	C
rs2740348	C	0.931, 0.880	1012	0.3144	1	rs2740348	C	0.902, 0.881	0.169	0.6813	1	rs2740348	C	0.940, 0.872	2492	0.1144	1	rs2740348	C	0.924, 0.861	1451	0.2283	1	rs2740348	C	0.895, 0.812	0.93	0.335	1	rs2740348	G	0.120, 0.038	1517	0.2181	1	rs2740348	G	0.127, 0.000	4523	0.0334	0.984	rs2740348	G	0.113, 0.062	1035	0.309	1	rs2740348	C
rs2910164	C	0.293, 0.182	2475	0.1157	1	rs2910164	C	0.238, 0.200	0.254	0.6142	1	rs2910164	G	0.827, 0.776	0.687	0.4074	1	rs2910164	G	0.787, 0.694	1415	0.2342	1	rs2910164	C	0.250, 0.100	2159	0.1417	1	rs2910164	G	0.796, 0.773	0.062	0.804	1	rs2910164	G	0.800, 0.647	3541	0.0599	0.999	rs2910164	C	0.239, 0.180	0.752	0.386	1	rs2910164	C
rs322825	T	0.379, 0.314	0.659	0.4169	1	rs322825	C	0.711, 0.568	3.17	0.075	1	rs322825	C	0.708, 0.658	0.501	0.479	1	rs322825	C	0.685, 0.583	1375	0.241	1	rs322825	T	0.356, 0.250	0.838	0.36	1	rs322825	C	0.709, 0.577	1767	0.1838	1	rs322825	C	0.692, 0.656	0.155	0.694	1	rs322825	C	0.704, 0.646	0.571	0.4497	1	rs322825	C
rs34115976	C	0.823, 0.795	0.172	0.6787	1	rs34115976	C	0.804, 0.762	0.357	0.55	1	rs34115976	G	0.229, 0.192	0.349	0.5546	1	rs34115976	G	0.216, 0.211	0.0060	0.9405	1	rs34115976	C	0.755, 0.700	0.266	0.6061	1	rs34115976	C	0.804, 0.769	0.168	0.682	1	rs34115976	G	0.220, 0.147	0.876	0.3493	1	rs34115976	G	0.236, 0.173	0.87	0.3508	1	rs34115976	C
rs34324334	T	0.113, 0.088	0.254	0.6145	1	rs34324334	C	0.929, 0.825	4046	0.0443	0.996	rs34324334	T	0.128, 0.064	1933	0.1644	1	rs34324334	C	0.905, 0.895	0.037	0.8468	1	rs34324334	T	0.116, 0.050	0.781	0.3767	1	rs34324334	C	0.896, 0.885	0.027	0.8688	1	rs34324334	C	0.885, 0.875	0.023	0.8796	1	rs34324334	T	0.103, 0.096	0.019	0.8902	1	rs34324334	T
rs35987994	G	0.094, 0.034	2367	0.1239	1	rs35987994	A	0.951, 0.909	1088	0.297	1	rs35987994	A	0.951, 0.936	0.192	0.6616	1	rs35987994	A	0.959, 0.861	5171	0.023	0.937	rs35987994	A	0.964, 0.909	1.31	0.2524	1	rs35987994	A	0.972, 0.846	7805	0.0052	0.608	rs35987994	A	0.956, 0.917	0.883	0.3474	1	rs35987994	A	0.965, 0.889	4368	0.0366	0.9950	rs35987994	G
rs37060	G	0.839, 0.750	1678	0.1951	1	rs37060	G	0.806, 0.738	0.938	0.3327	1	rs37060	A	0.290, 0.105	8876	0.0029	0.3750	rs37060	G	0.800, 0.676	2515	0.1128	1	rs37060	G	0.731, 0.682	0.217	0.6414	1	rs37060	A	0.239, 0.136	1158	0.2818	1	rs37060	A	0.265, 0.118	3273	0.0704	1	rs37060	G	0.806, 0.780	0.151	0.6977	1	rs37060	A
rs3744741	C	0.924, 0.889	0.548	0.4593	1	rs3744741	T	0.088, 0.075	0.072	0.7879	1	rs3744741	T	0.125, 0.050	3033	0.0816	1	rs3744741	T	0.087, 0.053	0.5	0.4794	1	rs3744741	T	0.096, 0.050	0.451	0.5018	1	rs3744741	C	0.919, 0.846	1402	0.2363	1	rs3744741	T	0.101, 0.059	0.587	0.4434	1	rs3744741	T	0.115, 0.056	1.56	0.2117	1	rs3744741	T
rs3746444	G	0.177, 0.144	0.3	0.5838	1	rs3746444	G	0.194, 0.182	0.032	0.8585	1	rs3746444	A	0.863, 0.789	1668	0.1965	1	rs3746444	A	0.819, 0.750	0.911	0.3398	1	rs3746444	A	0.804, 0.778	0.064	0.7995	1	rs3746444	A	0.848, 0.714	2879	0.0897	1	rs3746444	A	0.833, 0.794	0.288	0.5913	1	rs3746444	A	0.831, 0.769	0.96	0.3271	1	rs3746444	G
rs3763425	C	0.850, 0.845	0.0060	0.9376	1	rs3763425	T	0.162, 0.119	0.477	0.4898	1	rs3763425	T	0.208, 0.112	2912	0.0879	1	rs3763425	T	0.169, 0.079	1926	0.1652	1	rs3763425	C	0.880, 0.800	0.929	0.3351	1	rs3763425	C	0.846, 0.808	0.233	0.6296	1	rs3763425	T	0.167, 0.118	0.492	0.4831	1	rs3763425	T	0.154, 0.135	0.116	0.7331	1	rs3763425	T
rs3764942	T	0.086, 0.076	0.049	0.8239	1																			rs3764941	T	0.660, 0.650	0.0080	0.9285	1
rs3792830	G	0.045, 0.043	0.0040	0.9525	1	rs3764942	C	0.929, 0.895	0.484	0.4864	1	rs3764942	C	0.913, 0.897	0.121	0.7284	1	rs3764942	T	0.084, 0.079	0.012	0.913	1	rs3764942	C	0.934, 0.812	2726	0.0988	1	rs3764942	T	0.081, 0.077	0.0050	0.9457	1	rs3764942	C	0.908, 0.900	0.017	0.8963	1	rs3764942	C	0.934, 0.860	2534	0.1114	1	rs3764942	T
rs3805500	A	0.817, 0.714	1994	0.1579	1	rs3792830	A	0.958, 0.909	1665	0.197	1	rs3792830	G	0.048, 0.038	0.122	0.7273	1	rs3792830	G	0.058, 0.000	2.32	0.1277	1	rs3792830	A	0.927, 0.909	0.087	0.7686	1	rs3792830	G	0.049, 0.036	0.088	0.7668	1	rs3792830	A	0.963, 0.944	0.239	0.6248	1	rs3792830	G	0.062, 0.018	1649	0.1991	1	rs3792830	A
rs3812265	T	0.241, 0.220	0.092	0.7615	1	rs3805500	A	0.750, 0.625	2492	0.1144	1	rs3805500	A	0.740, 0.667	1104	0.2933	1	rs3805500	A	0.696, 0.684	0.021	0.8855	1	rs3805500	A	0.702, 0.600	0.808	0.3686	1	rs3805500	G	0.269, 0.250	0.041	0.8389	1	rs3805500	A	0.770, 0.667	1577	0.2092	1	rs3805500	G	0.306, 0.196	2384	0.1226	1	rs3805500	A
rs3823994	A	0.694, 0.640	0.47	0.4931	1	rs3812265	T	0.243, 0.200	0.333	0.5641	1	rs3812265	C	0.798, 0.769	0.207	0.649	1	rs3812265	C	0.785, 0.722	0.655	0.4184	1	rs3812265	T	0.231, 0.188	0.154	0.6946	1	rs3812265	T	0.246, 0.154	1.04	0.3078	1	rs3812265	T	0.246, 0.176	0.729	0.3933	1	rs3812265	C	0.776, 0.760	0.054	0.8167	1	rs3812265	C
rs41291179	T	0.981, 0.943	1213	0.2707	1	rs3823994	T	0.346, 0.262	1065	0.302	1	rs3823994	T	0.347, 0.321	0.136	0.7122	1	rs3823994	T	0.327, 0.306	0.063	0.802	1	rs3823994	T	0.343, 0.200	1576	0.2093	1	rs3823994	T	0.370, 0.192	3057	0.0804	1	rs3823994	A	0.657, 0.618	0.182	0.6699	1	rs3823994	T	0.336, 0.327	0.013	0.9086	1	rs3823994	A
rs417309	A	0.065, 0.033	0.813	0.3674	1	rs41291179	C	0.040, 0.024	0.245	0.6207	1	rs41291179	C	0.061, 0.014	2458	0.1169	1	rs41291179	C	0.044, 0.029	0.146	0.7026	1	rs41291179	T	0.960, 0.950	0.042	0.8381	1	rs41291179	C	0.052, 0.000	1203	0.2727	1	rs41291179	C	0.056, 0.000	2008	0.1564	1	rs41291179	C	0.052, 0.020	0.91	0.3401	1	rs41291179	T
												rs417309	G	0.970, 0.936	1187	0.2759	1	rs417309	G	0.958, 0.944	0.136	0.7127	1	rs417309	G	0.939, 0.889	0.605	0.4368	1							rs417309	A	0.045, 0.029	0.172	0.6781	1
rs4821943	A	0.783, 0.711	0.976	0.3232	1	rs4821943	A	0.738, 0.714	0.092	0.7622	1	rs4821943	G	0.260, 0.250	0.023	0.8803	1	rs4821943	G	0.265, 0.250	0.035	0.8523	1	rs4821943	A	0.755, 0.700	0.266	0.6061	1	rs4821943	G	0.268, 0.154	1517	0.2181	1	rs4821943	G	0.261, 0.200	0.49	0.4841	1	rs4821943	G	0.264, 0.220	0.379	0.5383	1	rs4821943	G
rs4867329	C	0.625, 0.467	3766	0.0523	0.999	rs4867329	A	0.524, 0.476	0.302	0.5825	1	rs4867329	C	0.538, 0.438	1844	0.1745	1	rs4867329	A	0.546, 0.474	0.655	0.4184	1	rs4867329	C	0.526, 0.400	1086	0.2973	1	rs4867329	A	0.486, 0.423	0.356	0.5505	1	rs4867329	A	0.529, 0.382	2346	0.1256	1	rs4867329	A	0.527, 0.500	0.113	0.7366	1	rs4867329	A
rs4909237	A	0.200, 0.160	0.414	0.52	1	rs4909237	A	0.165, 0.143	0.118	0.7314	1	rs4909237	A	0.167, 0.150	0.093	0.7604	1	rs4909237	G	0.853, 0.816	0.329	0.5661	1	rs4909237	G	0.842, 0.667	3216	0.0729	1	rs4909237	G	0.858, 0.750	1824	0.1769	1	rs4909237	G	0.860, 0.706	4584	0.0323	0.983	rs4909237	G	0.862, 0.771	2248	0.1338	1	rs4909237	A
rs4961280	C	0.917, 0.891	0.263	0.6083	1	rs4961280	A	0.130, 0.100	0.26	0.6103	1	rs4961280	A	0.106, 0.103	0.0050	0.9442	1	rs4961280	A	0.113, 0.083	0.273	0.6014	1	rs4961280	A	0.100, 0.056	0.36	0.5487	1	rs4961280	A	0.106, 0.077	0.199	0.6554	1	rs4961280	A	0.110, 0.059	0.801	0.3709	1	rs4961280	A	0.125, 0.077	0.886	0.3465	1	rs4961280	C
rs550894	C	0.931, 0.882	0.918	0.3379	1	rs550894	A	0.132, 0.028	3164	0.0753	1	rs550894	A	0.131, 0.081	1019	0.3127	1	rs550894	A	0.123, 0.031	2332	0.1267	1	rs550894	A	0.085, 0.056	0.179	0.6727	1	rs550894	A	0.125, 0.000	3622	0.057	0.999	rs550894	A	0.119, 0.067	0.67	0.413	1	rs550894	A	0.139, 0.040	3562	0.0591	1	rs550894	C
rs563002	C	0.155, 0.120	0.39	0.5321	1	rs563002	T	0.884, 0.816	1285	0.2569	1	rs563002	T	0.867, 0.862	0.0090	0.925	1	rs563002	T	0.867, 0.806	0.922	0.3369	1	rs563002	T	0.898, 0.667	7083	0.0078	0.738	rs563002	C	0.143, 0.115	0.139	0.7096	1	rs563002	C	0.157, 0.156	0.0	0.9948	1	rs563002	T	0.873, 0.769	3.15	0.0759	1	rs563002	T
rs58834075	A	0.032, 0.023	0.127	0.7213	1	rs58834075	A	0.025, 0.024	0.0010	0.9737	1	rs58834075	G	0.980, 0.962	0.471	0.4924	1	rs58834075	G	0.976, 0.975	0.0010	0.9822	1	rs58834075	G	0.982, 0.950	0.789	0.3743	1	rs58834075	A	0.036, 0.000	1031	0.31	1	rs58834075	G	0.978, 0.941	1247	0.2642	1	rs58834075	A	0.028, 0.019	0.147	0.7018	1	rs58834075	G
rs595961	G	0.222, 0.159	0.892	0.345	1	rs595961	G	0.182, 0.125	0.726	0.3941	1	rs595961	G	0.214, 0.095	4432	0.0353	0.9930	rs595961	A	0.844, 0.824	0.085	0.7701	1	rs595961	A	0.856, 0.722	1997	0.1576	1	rs595961	A	0.826, 0.750	0.784	0.3758	1	rs595961	A	0.815, 0.812	0.0010	0.97	1	rs595961	A	0.880, 0.717	6874	0.0087	0.7440	rs595961	G
rs636832	A	0.100, 0.093	0.02	0.888	1	rs636832	A	0.096, 0.048	0.993	0.319	1	rs636832	A	0.117, 0.051	2314	0.1282	1	rs636832	A	0.100, 0.053	0.834	0.3612	1	rs636832	G	0.925, 0.833	1583	0.2083	1	rs636832	G	0.906, 0.875	0.218	0.6407	1	rs636832	G	0.914, 0.889	0.214	0.6434	1	rs636832	G	0.929, 0.860	2126	0.1448	1	rs636832	A
						rs639174	C	0.756, 0.750	0.0070	0.9357	1	rs639174	C	0.750, 0.735	0.046	0.8302	1	rs639174	T	0.294, 0.094	5538	0.0186	0.903							rs639174	T	0.235, 0.125	1438	0.2305	1							rs639174	T	0.272, 0.160	2503	0.1136	1
						rs6497759	G	0.833, 0.810	0.133	0.7153	1	rs6497759	A	0.157, 0.154	0.0030	0.9559	1	rs6497759	A	0.146, 0.132	0.055	0.8151	1																			rs6497759	G	0.838, 0.769	1218	0.2697	1	rs6497759	G
rs6505162	C	0.625, 0.477	3255	0.0712	1	rs6505162	C	0.556, 0.432	2145	0.1431	1	rs6505162	C	0.570, 0.539	0.163	0.6864	1	rs6505162	C	0.581, 0.450	2232	0.1352	1	rs6505162	C	0.571, 0.400	2011	0.1561	1	rs6505162	A	0.486, 0.393	0.808	0.3688	1	rs6505162	A	0.470, 0.412	0.372	0.5417	1	rs6505162	A	0.486, 0.407	0.952	0.3292	1	rs6505162	C
rs6841938	G	0.938, 0.911	0.363	0.5471	1	rs6841938	A	0.102, 0.045	1371	0.2416	1	rs6841938	A	0.090, 0.073	0.169	0.6812	1	rs6841938	A	0.094, 0.025	2079	0.1493	1	rs6841938	G	0.921, 0.850	1054	0.3047	1	rs6841938	G	0.910, 0.893	0.079	0.7786	1	rs6841938	G	0.926, 0.912	0.083	0.7729	1	rs6841938	A	0.095, 0.074	0.205	0.6505	1	rs6841938	G
rs6865950	A	0.167, 0.162	0.0040	0.9491	1	rs6865950	G	0.871, 0.850	0.124	0.7251	1	rs6865950	A	0.193, 0.097	2.86	0.0908	1	rs6865950	G	0.858, 0.853	0.0060	0.9381	1	rs6865950	G	0.891, 0.778	1747	0.1863	1	rs6865950	G	0.844, 0.818	0.094	0.7586	1	rs6865950	A	0.181, 0.125	0.561	0.4539	1	rs6865950	A	0.156, 0.114	0.479	0.489	1	rs6865950	G
rs6877400	T	0.933, 0.905	0.374	0.5408	1	rs6877400	T	0.911, 0.850	1325	0.2497	1	rs6877400	C	0.110, 0.081	0.403	0.5253	1	rs6877400	C	0.125, 0.026	3154	0.0757	1	rs6877400	T	0.913, 0.818	1782	0.182	1	rs6877400	C	0.090, 0.077	0.043	0.8348	1	rs6877400	T	0.914, 0.882	0.321	0.5707	1	rs6877400	C	0.132, 0.037	3729	0.0535	1	rs6877400	T
						rs6877842	C	0.256, 0.075	6126	0.0133	0.840	rs6877842	C	0.265, 0.153	3098	0.0784	1																			rs6877842	C	0.220, 0.167	0.415	0.5197	1
rs6884823	G	0.968, 0.955	0.165	0.6846	1	rs6884823	G	0.951, 0.929	0.339	0.5602	1	rs6884823	A	0.082, 0.025	2664	0.1026	1	rs6884823	A	0.071, 0.000	2882	0.0896	1	rs6884823	G	0.938, 0.850	1856	0.1731	1	rs6884823	A	0.063, 0.038	0.244	0.6215	1	rs6884823	G	0.955, 0.912	1.01	0.3148	1	rs6884823	A	0.062, 0.058	0.011	0.9183	1	rs6884823	A
rs72631827	T	0.017, 0.000	1543	0.2141	1	rs72631827	G	1.000, 0.974	4443	0.0351	0.988	rs72631827	G	1.000, 0.987	1376	0.2408	1	rs72631827	T	0.006, 0.000	0.213	0.6446	1	rs72631827	T	0.009, 0.000	0.162	0.6874	1	rs72631827	T	0.007, 0.000	0.165	0.6843	1	rs72631827	T	0.007, 0.000	0.233	0.6291	1	rs72631827	T	0.007, 0.000	0.34	0.5601	1	rs72631827	G
rs7735863	A	0.067, 0.054	0.099	0.7531	1	rs7735863	A	0.072, 0.048	0.325	0.5686	1	rs7735863	A	0.106, 0.039	2691	0.1009	1	rs7735863	A	0.093, 0.028	1689	0.1938	1	rs7735863	G	0.929, 0.850	1371	0.2416	1	rs7735863	G	0.925, 0.917	0.019	0.8914	1	rs7735863	G	0.949, 0.875	2368	0.1238	1	rs7735863	-	0.080, 0.080	0.0	1.0	1	rs7735863	G
rs7755135	A	0.150, 0.107	0.588	0.4433	1	rs7755135	G	0.855, 0.810	0.527	0.468	1	rs7755135	G	0.885, 0.825	1307	0.2529	1	rs7755135	A	0.160, 0.105	0.727	0.3939	1	rs7755135	A	0.142, 0.062	0.762	0.3828	1	rs7755135	G	0.866, 0.846	0.07	0.7914	1	rs7755135	G	0.891, 0.882	0.019	0.8915	1	rs7755135	G	0.873, 0.827	0.665	0.4147	1	rs7755135	G
rs784567	A	0.560, 0.560	0.0	0.9957	1	rs784567	A	0.595, 0.559	0.146	0.7024	1	rs784567	G	0.391, 0.382	0.013	0.9085	1	rs784567	A	0.633, 0.529	1263	0.2611	1	rs784567	G	0.375, 0.350	0.044	0.8332	1	rs784567	A	0.597, 0.444	1515	0.2183	1	rs784567	A	0.600, 0.464	1737	0.1875	1	rs784567	A	0.619, 0.523	1285	0.2569	1	rs784567	G
rs7911488	G	0.420, 0.350	0.642	0.423	1	rs7911488	G	0.408, 0.381	0.102	0.7495	1	rs7911488	A	0.622, 0.551	0.824	0.3641	1	rs7911488	G	0.412, 0.368	0.24	0.6239	1	rs7911488	A	0.620, 0.611	0.0050	0.943	1	rs7911488	G	0.406, 0.350	0.228	0.6328	1	rs7911488	G	0.417, 0.393	0.053	0.8177	1	rs7911488	A	0.631, 0.565	0.616	0.4326	1	rs7911488	G
rs895819	C	0.371, 0.317	0.457	0.4991	1	rs895819	T	0.667, 0.619	0.333	0.564	1	rs895819	T	0.663, 0.632	0.189	0.6639	1	rs895819	T	0.654, 0.618	0.166	0.684	1	rs895819	T	0.679, 0.500	2379	0.123	1	rs895819	C	0.356, 0.250	1162	0.281	1	rs895819	T	0.683, 0.583	1229	0.2676	1	rs895819	C	0.351, 0.315	0.221	0.638	1	rs895819	T
rs9606248	A	0.828, 0.695	3179	0.0746	1	rs9606248	G	0.291, 0.143	3728	0.0535	1	rs9606248	A	0.761, 0.697	0.851	0.3563	1	rs9606248	G	0.292, 0.278	0.03	0.8635	1	rs9606248	G	0.250, 0.125	1211	0.2711	1	rs9606248	G	0.254, 0.154	1195	0.2743	1	rs9606248	G	0.254, 0.219	0.17	0.6797	1	rs9606248	G	0.306, 0.167	3486	0.0619	1	rs9606248	A
[truncated: 10 more columns]
